# Supplementary material for: Inhibitory effect of Citrus flavonoids on the in vitro transport activity of human urate transporter 1 (URAT1/SLC22A12), a renal re-absorber of urate
Source: PubMed Central journal article supplement (PMC7002704; doi:10.1038/s41538-020-0063-7), 2020-02-05
Supplement: 41538_2020_63_MOESM1_ESM.pdf [file 41538_2020_63_MOESM1_ESM.pdf]

## SUPPLEMENTARY INFORMATION

**Inhibitory effect of *Citrus* flavonoids on the *in vitro* transport activity of human urate transporter 1 (URAT1/SLC22A12), a renal re-absorber of urate**

**Yu Toyoda<sup>1,\*</sup>, Tappei Takada<sup>1,\*</sup>, Hiroki Saito<sup>1,2,\*</sup>, Hiroshi Hirata<sup>2</sup>, Ami Ota-Kontani<sup>2</sup>, Naoyuki Kobayashi<sup>2</sup>, Youichi Tsuchiya<sup>2</sup>, and Hiroshi Suzuki<sup>1</sup>**

<sup>1</sup> Department of Pharmacy, The University of Tokyo Hospital, 7-3-1 Hongo, Bunkyo-ku, Tokyo 113-8655, Japan

<sup>2</sup> Frontier Laboratories for Value Creation, SAPPORO HOLDINGS LTD., 10 Okatome, Yaizu, Shizuoka 425-0013, Japan

\* These authors contributed equally to this work

Correspondence: tappei-ky@umin.ac.jp (TT)

---

**Supplementary Table 1**

**Supplementary Figures 1–3**

**Supplementary References**

**Supplementary Table 1** Key resources.

| REAGENT or RESOURCE                                           | SOURCE                                  | IDENTIFIER                                                                                                                  |
|---------------------------------------------------------------|-----------------------------------------|-----------------------------------------------------------------------------------------------------------------------------|
| Antibodies                                                    |                                         |                                                                                                                             |
| Rabbit polyclonal anti-EGFP                                   | Life Technologies                       | Cat# A11122; RRID: AB_221569                                                                                                |
| Rabbit polyclonal anti- $\alpha$ -tubulin                     | Abcam                                   | Cat# ab15246; RRID: AB_301787                                                                                               |
| Donkey anti-rabbit IgG-horseradish peroxidase (HRP)-conjugate | GE Healthcare                           | Cat# NA934V; RRID: AB_772206                                                                                                |
| Chemicals                                                     |                                         |                                                                                                                             |
| [8- <sup>14</sup> C]-uric acid (53 mCi/mmol)                  | American Radiolabeled Chemicals         | Cat# ARC0513                                                                                                                |
| Benzbromarone                                                 | FUJIFILM Wako Pure Chemical Corporation | Cat# 028-1585; CAS: 3562-84-3; Purity: >98%                                                                                 |
| Clear-sol II                                                  | Nacalai Tesque                          | Cat# 09136-83                                                                                                               |
| Dimethyl Sulfoxide                                            | Nacalai Tesque                          | Cat# 13445-74; CAS: 67-68-5                                                                                                 |
| Hesperetin                                                    | FUJIFILM Wako Pure Chemical Corporation | Cat# 320-93841; CAS: 520-33-2; Purity: >96%                                                                                 |
| Hesperidin                                                    | FUJIFILM Wako Pure Chemical Corporation | Cat# 088-07341; CAS: 520-26-3; Purity: >95%                                                                                 |
| Naringenin                                                    | Combi-Blocks                            | Cat# QA-3717; CAS: 480-41-1; Purity: >98%                                                                                   |
| Naringin                                                      | ChromaDex                               | Cat# ASB-00014222-001; CAS: 10236-47-2; Purity: not available                                                               |
| Neohesperidin                                                 | Combi-Blocks                            | Cat# QV-2102; CAS: 13241-33-3; Purity: >98%                                                                                 |
| Nobiletin                                                     | FUJIFILM Wako Pure Chemical Corporation | Cat# 149-09341; CAS: 478-01-3; Purity: >98%                                                                                 |
| Polyethelenimine "MAX" (PEI-MAX)                              | Polysciences                            | Cat# 24765; CAS: 49553-93-7                                                                                                 |
| Tangeretin                                                    | FUJIFILM Wako Pure Chemical Corporation | Cat# 208-15671; CAS: 481-53-8; Purity: >95%                                                                                 |
| Critical Commercial Assays                                    |                                         |                                                                                                                             |
| Pierce <sup>TM</sup> BCA Protein Assay Reagent A              | Thermo Fisher Scientific                | Cat# 23223                                                                                                                  |
| Pierce <sup>TM</sup> BCA Protein Assay Reagent B              | Thermo Fisher Scientific                | Cat# 23224                                                                                                                  |
| PureLink <sup>TM</sup> HiPure Plasmid Filter Midiprep Kit     | Thermo Fisher Scientific                | Cat# K210015                                                                                                                |
| Recombinant DNA                                               |                                         |                                                                                                                             |
| The complete human URAT1 cDNA                                 | Miyata et al, 2016 <sup>1</sup>         | NCBI Reference Sequence: NM_144585.3                                                                                        |
| Experimental Models: Cell Lines                               |                                         |                                                                                                                             |
| 293A                                                          | Invitrogen                              | R70507                                                                                                                      |
| Software and Algorithms                                       |                                         |                                                                                                                             |
| Excel 2013                                                    | Microsoft                               | <a href="https://products.office.com/ja-jp/microsoft-excel-2013">https://products.office.com/ja-jp/microsoft-excel-2013</a> |
| Statcel3 add-in software                                      | OMS Publishing                          | <a href="http://www.oms-publ.co.jp/">http://www.oms-publ.co.jp/</a>                                                         |

Information on purity was from data sheets of each chemical provided by suppliers.

## Supplementary Figure 1

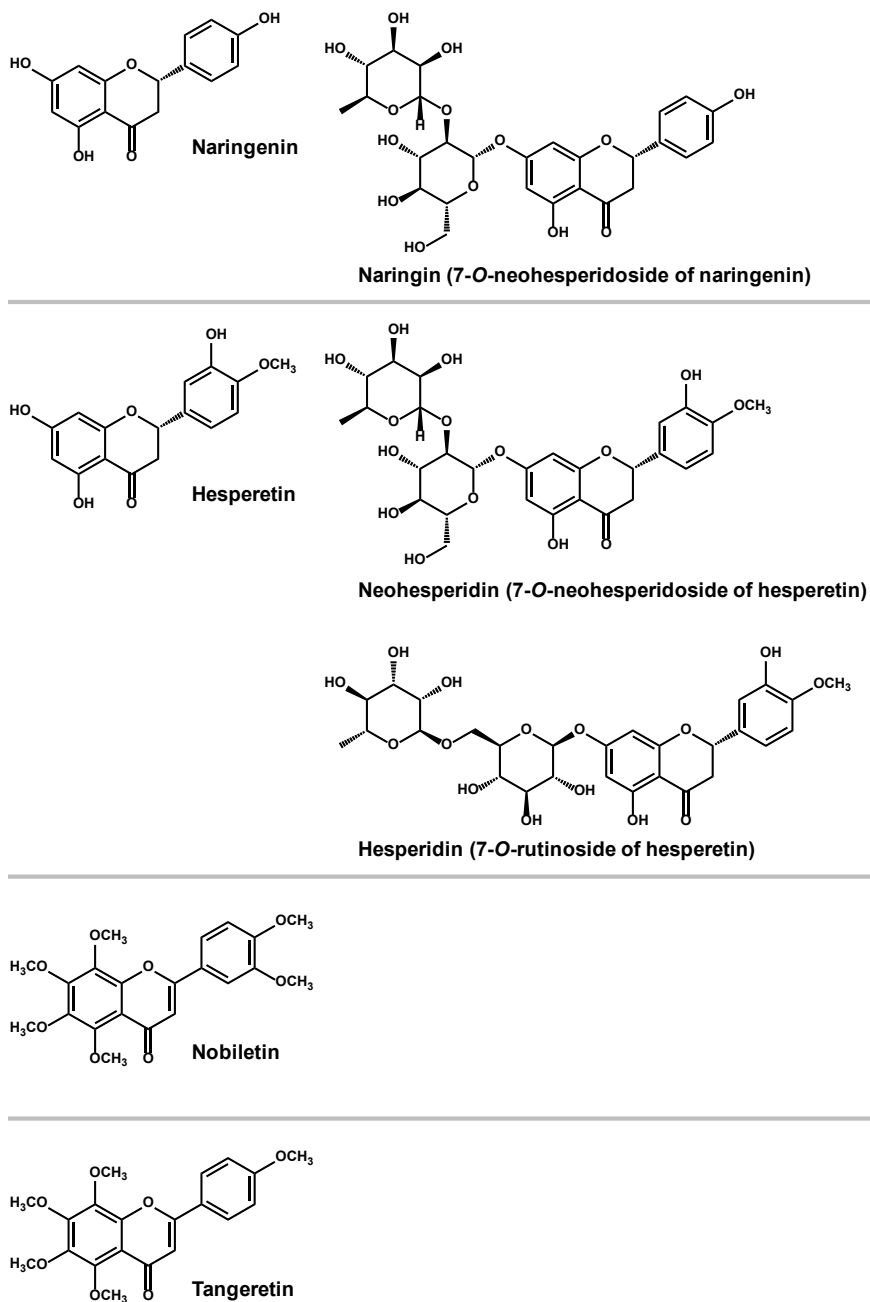

**Supplementary Figure 1 Chemical structures of seven *Citrus* flavonoids evaluated in the present study.** According to a previous study,<sup>2</sup> the values of the half maximal inhibitory concentration against xanthine oxidase of each *Citrus* flavonoid are 16.5  $\mu\text{M}$  (hesperetin), 107.5  $\mu\text{M}$  (nobiletin), about 200  $\mu\text{M}$  (naringenin) and >200  $\mu\text{M}$  (naringin, neohesperidin, hesperidin, and tangeretin), respectively.

## Supplementary Figure 2

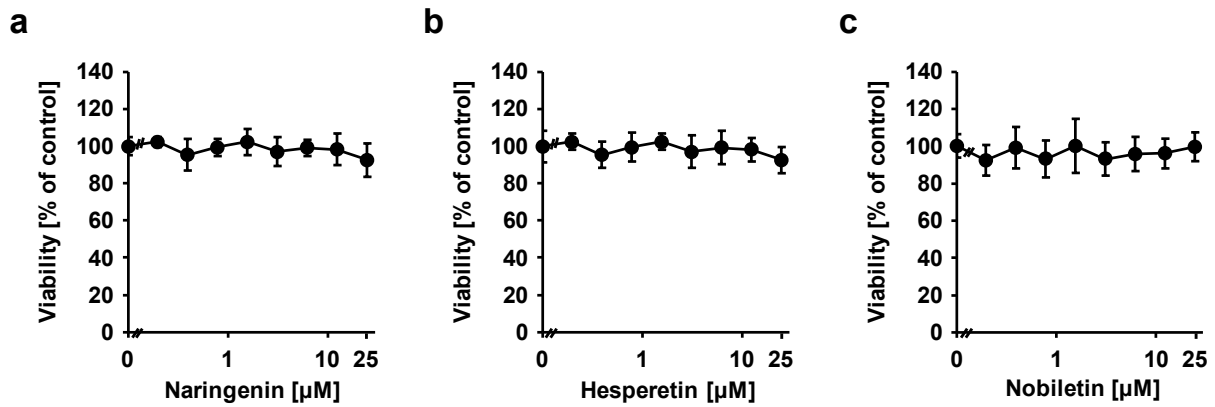

**Supplementary Figure 2 Effect of *Citrus* flavonoids on the viability of 293A cells in long term culture.** 293A cells were incubated with each flavonoid at indicated concentrations for 48 h. The cell viability (vs. vehicle control) was measured by WST-8 assay. Under these experimental conditions, all tested flavonoids had little effect on cytotoxicity, suggesting that these flavonoids could be safe for 293A cells at concentrations of under 25  $\mu\text{M}$  (maximum concentration in this assay). Data are expressed as mean  $\pm$  SD.  $n = 8$ .

### Supplementary Figure 3

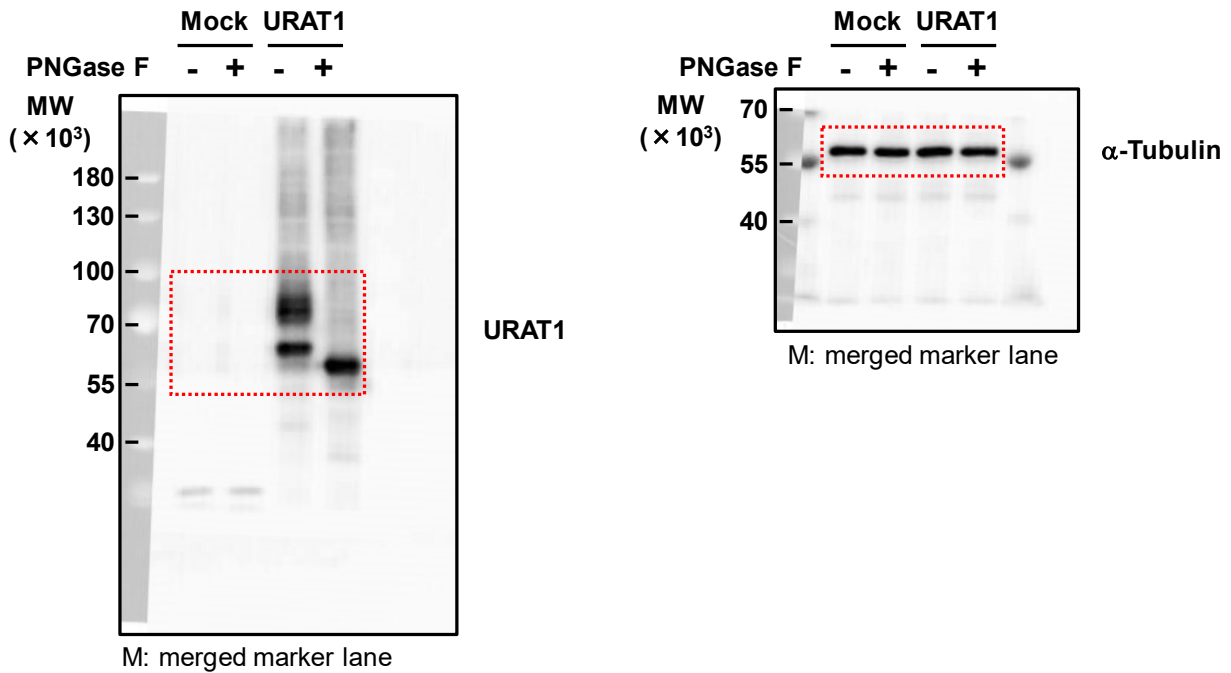

### Supplementary Figure 3. Uncropped images of Figure 1a.

Full images of immunoblotting of EGFP-tagged URAT1 (*left*) and  $\alpha$ -tubulin (*right*: membrane was sliced before detection based on the molecular size of interested proteins). Blots in each cropped area indicated by red dashed box derived from the same experiment.

### Supplementary References

1. Miyata, H. *et al.* Identification of Febuxostat as a New Strong ABCG2 Inhibitor: Potential Applications and Risks in Clinical Situations. *Front. Pharmacol.* **7**, 518 (2016).
2. Liu, K. *et al.* Chemical Evidence for Potent Xanthine Oxidase Inhibitory Activity of Ethyl Acetate Extract of *Citrus aurantium* L. Dried Immature Fruits. *Molecules* **21**, 302 (2016).
